# Supplementary material for: Self-healing and tough GO-supported hydrogels preparedviasurface-initiated ATRP and photocatalytic modification
Source: Royal Society of Chemistry journal article supplement (doi:10.1039/c8nj05186k), 2019-01-01
Supplement: c8nj05186k1.pdf [file c8nj05186k1.pdf]

## Supporting Information

### **Self-healing and Tough GO-supported Hydrogels via Surface-initiated ATRP and Photocatalytic Modification**

Dechao Fan, Wenxiang Wang, Hou Chen\*, Liangjiu Bai\*, Huawei Yang, Donglei Wei, Lixia Yang, Zhongxin Xue, Yuzhong Niu

Key Laboratory of High Performance and Functional Polymer in the Universities of Shandong Province; Collaborative Innovation Center of Shandong Province for High Performance Fibers and Their Composites; School of Chemistry and Materials Science. Ludong University, Yantai 264025, China. E-mail: [chenhou@ldu.edu.cn](mailto:chenhou@ldu.edu.cn) (H. Chen), Tel: +86-535-6697933; [bailiangjiu@ldu.edu.cn](mailto:bailiangjiu@ldu.edu.cn) (L. J. Bai), Tel: +86-535-6669070.

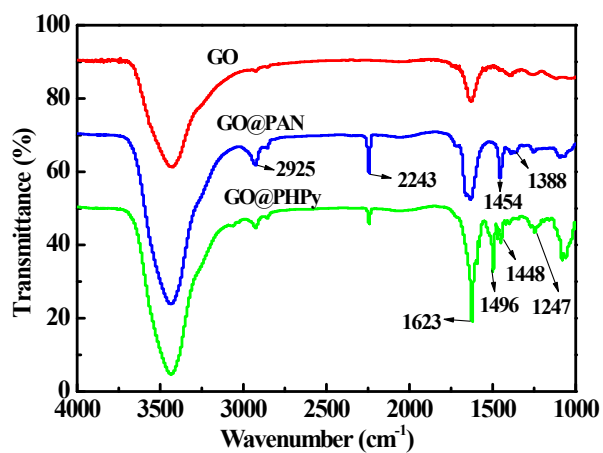

**Figure S1.** The FT-IR spectrogram of GO, GO@PAN and GO@PHPy.

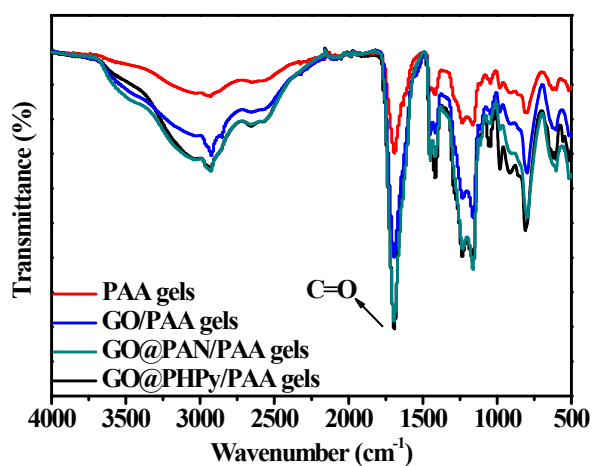

**Figure S2.** FT-IR spectrogram of PAA, GO/PAA, GO@PAN/PAA and GO@PHPy/PAA composite hydrogels.

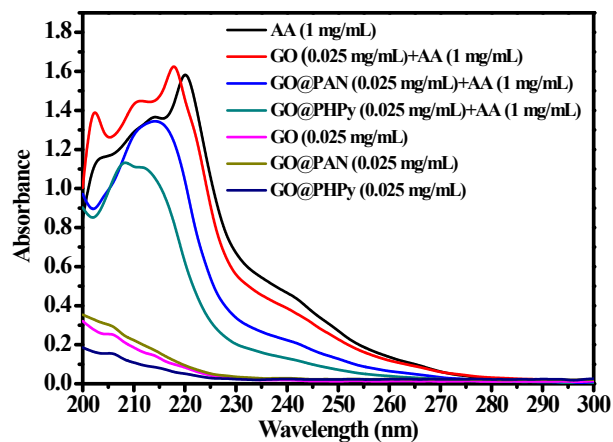

**Figure S3.** UV-Vis spectra of GO (0.025 mg/mL), GO@PAN (0.025 mg/mL), GO@PHPy (0.025 mg/mL), AA (1 mg/mL), GO (0.025 mg/mL)+AA (1 mg/mL), GO@PAN (0.025 mg/mL)+AA (1 mg/mL) and GO@PHPy (0.025 mg/mL)+AA (1 mg/mL) solution.

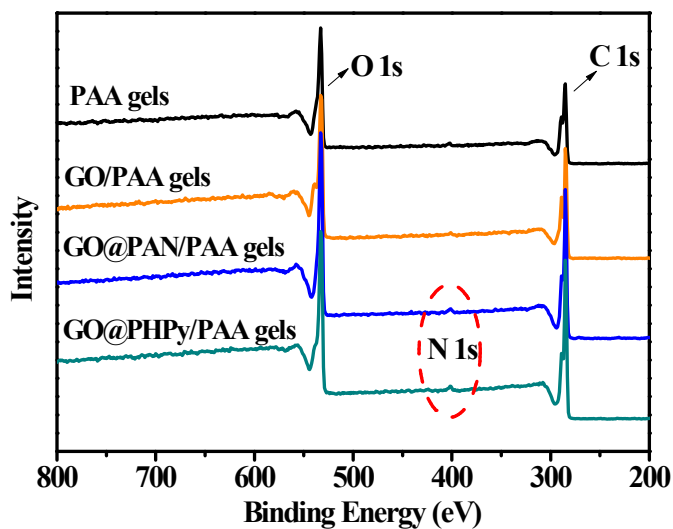

**Figure S4.** XPS spectra of PAA gels, GO/PAA gels, GO@PAN/PAA gels and GO@PHPy/PAA gels.

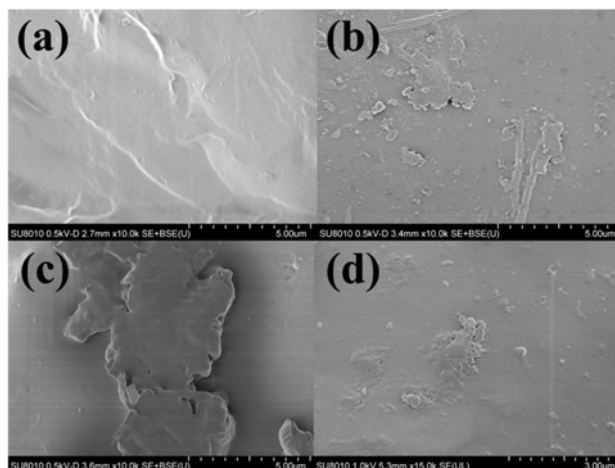

**Figure S5.** SEM image of PAA hydrogels (a), GO/PAA hydrogels (b) GO@PAN/PAA gels (c) and GO@PHPy/PAA hydrogels (d).

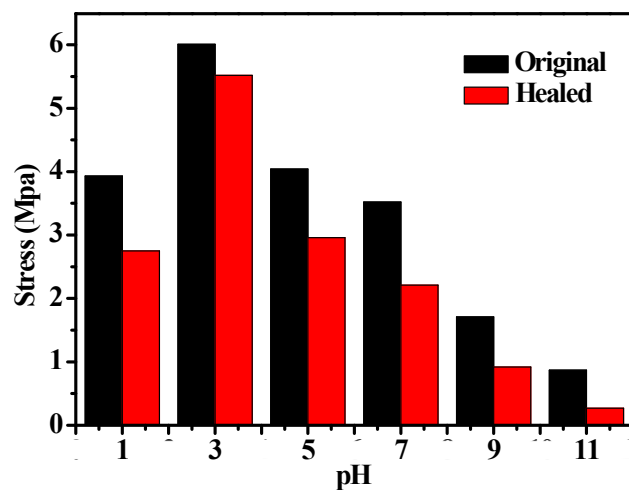

**Figure S6.** Stress image of GO@PHPy/PAA gels at different pH.

**Table S1.** Chemical composition of GO, GO@DETA, GO@BiBB, GO@PAN and GO@PHPy from XPS.

| Samples | XPS (atom %) |      |     |      |
|---------|--------------|------|-----|------|
|         | C            | O    | Br  | N    |
| GO      | 64.2         | 29.5 | 0   | 0    |
| GO@DETA | 64.4         | 25.6 | 0   | 5.6  |
| GO@BiBB | 65.5         | 24.6 | 0.4 | 5.9  |
| GO@PAN  | 74.4         | 3.3  | 0.1 | 21.4 |
| GO@PHPy | 77.1         | 5.1  | 0.1 | 16.8 |
